# Supplementary material
Source: MDPI journal article supplement (https://www.mdpi.com/2073-4433/14/3/510)
Supplement: s1 [file s1]

---

# Supplementary Materials: Mid-Latitude Jet Response to Pan-Arctic and Regional Arctic Warming in Idealized GCM

Gun-Hwan Yang, Woosok Moon, Hayeon Noh and Baek-Min Kim \*

Division of Earth Environmental System Science, Major of Environmental Atmospheric Sciences, Pukyong National University, Busan 48513, Republic of Korea

\* Correspondence: baekmin@pknu.ac.kr

**Table S1.** Strength of Q-flux

| Experiments | Q-flux strength(W/m <sup>2</sup> ) |
|-------------|------------------------------------|
| C1-HF1      | 15                                 |
| C1-HF2      | 25                                 |
| C1-HF3      | 35                                 |
| C1-HF4      | 45                                 |
| C1-HF5      | 55                                 |
| C1-HF6      | 65                                 |
| C1-HF7      | 75                                 |
| C1-HF8      | 85                                 |
| C2-HF1      | 90                                 |
| C2-HF2      | 150                                |
| C2-HF3      | 210                                |
| C2-HF4      | 270                                |
| C2-HF5      | 330                                |
| C2-HF6      | 390                                |
| C2-HF7      | 450                                |
| C2-HF8      | 510                                |

---
